# Supplementary material for: Network Models of TEM β-Lactamase Mutations Coevolving under Antibiotic Selection Show Modular Structure and Anticipate Evolutionary Trajectories
Source: PLoS Comput Biol. 2011 Sep 22;7(9):e1002184. doi: 10.1371/journal.pcbi.1002184 (PMC3178621; doi:10.1371/journal.pcbi.1002184)
Supplement: Table S1 — Lists of all naturally occurring TEM-1 mutants in our database. Each mutant is listed in column 1 and amino acid substitution mutations are indicated by residue position according to the Ambler system [65]. The mutants are listed in three worksheets by Bush-Jacoby phenotype class [27]: broad-spectrum antibiotic resistance (2b), extended-spectrum antibiotic resistance (2be), and inhibitor resistance (2br). FASTA sequences for all TEM-1 mutants from clinical isolates are included in Datasets S5-S8. (XLSX) [file pcbi.1002184.s004.xlsx]

## Sheet: CONTENTS
Sheet	Column	Description
2be	__	Naturally occurring TEM sequences that were found to confer bacterial resistance to extended-spectrum antibiotics.*
	TEM Name	Name that has been assigned to this TEM mutant *. The rest of the row contains the amino acid residue numbers in the TEM-1 reference sequence, using the Ambler** numbering scheme.
	27 to 289	Residue numbers (by the Ambler numbering scheme) of the mutated residue the TEM reference sequence. Only residues present in the mature protein were considered. Column color-coding: blue or green for residues, where mutations tend to confer the extended spectrum phenotype; orange for residue numbers with mutations predominantly conferring the inhibitor-resistance phenotype; red for residues where…
2br	__	Naturally occurring TEM sequences that were found to confer bacterial resistance to beta lactam inhibitors.*
	(See above)	(See above)
2b	__	Naturally occurring TEM sequences that were found to exhibit just the parental, broad-spectrum phenotype.*
	(See above)	(See above)
		* We used previously compiled and classified (by phenotype) by George Jacoby, and are available at the Lahey clinic website: http://www.lahey.org/Studies/temtable.asp
		** Ambler, R.P. et al. 1991. A standard numbering scheme for the class A ß-lactamases. Biochem. J. 276:269-272.

## Sheet: 2be
TEM Name	25	26	40	42	49	51	53	55	65	69	92	100	104	118	130	153	163	164	165	173	175	179	182	187	196	215	223	224	226	230	237	238	240	244	248	250	265	268	279	280
TEM-001	A	H	L	A	L	L	S	K	R	M	G	N	E	T	S	H	D	R	W	I	N	D	M	A	G	K	S	A	P	F	A	G	E	R	A	L	T	S	I	A
TEM-003													K																			S
TEM-004													K																			S					M
TEM-005																		S													T		K
TEM-006													K					H
TEM-007																		S
TEM-008													K					S														S
TEM-009													K					S																			M
TEM-010																		S															K
TEM-011																		H
TEM-012																		S
TEM-015													K																			S
TEM-016													K					H
TEM-017													K
TEM-018													K
TEM-019																																S
TEM-020																							T									S
TEM-021													K			R																S
TEM-022													K																		G	S
TEM-024													K					S													T		K
TEM-025																																S					M
TEM-026													K					S
TEM-027																		H															K				M
TEM-028																		H															K
TEM-029																		H
TEM-042				V																												S	K				M
TEM-043													K					H					T
TEM-046													K					S															K
TEM-047																																S	K				M
TEM-048																																S	K				M
TEM-049																																S	K				M	G
TEM-052													K										T									S
TEM-053																		S
TEM-056													K			R
TEM-060						P							K					S
TEM-061																		H															K
TEM-063													K					S					T
TEM-066											D		K																			S
TEM-071																																S	K
TEM-072																							T									S	K
TEM-075																		H																			M
TEM-085																		S															K				M
TEM-086																		S													T		K				M
TEM-087													K				H	C					T
TEM-088													K										T		D							S
TEM-091																		C					T										K
TEM-092													K										T									S
TEM-093																							T									S	K
TEM-094													K										T									S					M
TEM-101																																S	K							V
TEM-102																		S																			M
TEM-106													K										T
TEM-107													K					H					T									S
TEM-112																R																S
TEM-113													K										T									S
TEM-114																		S													T		K
TEM-115																		H
TEM-118																		H																			M
TEM-120																																S
TEM-123													K																			S
TEM-124													K										T
TEM-126																						E	T
TEM-129													K					S
TEM-130													K					S													T
TEM-131													K					S					T								T
TEM-132																		H		V													K
TEM-133													K					S
TEM-134													K					H														S
TEM-136																		S													T		K					G
TEM-137																		S															R
TEM-138													K								I											S
TEM-139					M								K																			S
TEM-142													K																			N					M
TEM-143																		C
TEM-144																		C															K
TEM-147																		H										V
TEM-149													K					S					T										V
TEM-155																		S															K
TEM-157												S
TEM-164			V																																				T
TEM-167													K															V				S					M
TEM-168																																					M
TEM-169										L									G
TEM-177													K					S					T								T		K
TEML-111																																								D
TEML-113									H
TEML-117														A
TEML-118							G
TEML-132																		S															K
TEML-136													K					S								R
TEML-139	V	R																																		V
TEML-143								G								G
TEML-144																													L					L	E
TEML-153						P							K					S						R			C			L
TEML-159																																	G

## Sheet: 2br
TEM Name	Phe	69	127	130	165	182	221	244	262	265	275	276	289
TEM-001	2b	M	I	S	W	M	L	R	V	T	R	N	H
TEM-030	2br							S
TEM-031	2br							C
TEM-032	2br	I				T
TEM-033	2br	L
TEM-034	2br	V
TEM-035	2br	L										D
TEM-036	2br	V										D
TEM-037	2br	I										D
TEM-038	2br	V									L
TEM-039	2br	L			R							D
TEM-040	2br	I
TEM-044	2br							S
TEM-045	2br	L									Q
TEM-051	2br							H
TEM-054	2br							L
TEM-058	2br							S	I
TEM-059	2br			G
TEM-065	2br							C
TEM-067	2br							C
TEM-073	2br							C		M
TEM-074	2br							S		M
TEM-076	2br			G
TEM-077	2br	L						S
TEM-078	2br	V			R							D
TEM-079	2br							G
TEM-080	2br	L	V									D
TEM-081	2br	L	V
TEM-082	2br	V									Q
TEM-083	2br	L			C						Q
TEM-084	2br											D
TEM-103	2br										L
TEM-122	2br										Q
TEM-145	2br						M	H
TEM-159	2br	I				T
TEM-160	2br	V
TEM-163	2br										Q		L
TEML-149	2br	V											L
TEML-150	2br							S					L

## Sheet: 2b
TEM Name	Phe	34	39	92	115	145	157	158	182	204	218	265
TEM-001	2b	K	Q	G	D	P	D	H	M	R	G	T
TEM-002	2b		K
TEM-013	2b											M
TEM-055	2b										E
TEM-057	2b			D
TEM-070	2b									Q
TEM-090	2b				G
TEM-095	2b					A
TEM-110	2b											M
TEM-127	2b							N
TEM-128	2b						E
TEM-135	2b								T
TEM-141	2b	E
