# Supplementary material for: Network Models of TEM β-Lactamase Mutations Coevolving under Antibiotic Selection Show Modular Structure and Anticipate Evolutionary Trajectories
Source: PLoS Comput Biol. 2011 Sep 22;7(9):e1002184. doi: 10.1371/journal.pcbi.1002184 (PMC3178621; doi:10.1371/journal.pcbi.1002184)
Supplement: Table S3 — Codon-based analysis of positive selection. We performed a PAML (codeml) [67] analysis for the naturally occurring sequences. Residue position number according to the Ambler system [65] (column 1); wild-type amino acid residue in TEM-1 (column 2); ω value (ratio of non-synonymous to synonymous nucleotide substitutions at a codon position) (column 3). "Site class" identified by codeml. Class 3 = strong positive selection, Class 2 = "relaxed" positive selection, Class 1 = no selection or negative selection (column 4). Node degree centrality = weighted degree centrality computed in a network constructed with only sequences from clinical isolates (column 5). (XLSX) [file pcbi.1002184.s006.xlsx]

## Sheet: rst.sites.123_netCentCLIN.txt
Ambler NumRes	WT	omega	PAML 3-class site model	Node degree centrality*
6	Q	9.879	3
21	L	10.461	3
69	M	10.485	3	0.595483
104	E	10.485	3	1.06284
153	H	10.368	3	0.0541668
164	R	10.485	3	0.925562
165	W	9.938	3	0.262864
182	M	10.485	3	0.70276
237	A	10.485	3	0.430136
238	G	10.485	3	0.6979
240	E	10.485	3	0.789059
244	R	10.485	3	0.00238189
265	T	8.358	3
275	R	10.485	3	0.132143
4	S	2.107	2
5	I	5.156	2
25	A	0.814	2
26	H	1.56	2
34	K	0.991	2
35	D	1.631	2
39	Q	1.547	2
40	L	2.589	2
49	L	2.091	2	0.000369527
51	L	1.639	2	0.0554558
53	S	1.239	2
55	K	3.134	2	0.00167785
65	R	1.169	2
84	V	0.814	2
92	G	0.876	2	0.000359455
100	N	0.831	2
115	D	0.815	2
118	T	0.999	2
127	I	0.802	2	0.0511745
130	S	0.87	2
145	P	1.42	2
157	D	0.815	2
158	H	1.019	2
163	D	0.817	2	0.000607655
173	I	0.801	2	0.000382489
175	N	1.114	2	0.000369527
179	D	1.048	2	0.000305064
184	A	2.853	2
187	A	3.016	2	0.0170811
196	G	1.296	2	0.000674591
215	K	0.991	2	0.000302591
218	G	1.115	2
221	L	2.1	2	0.000447427
223	S	4.291	2	0.0170811
224	A	3.95	2	0.000499276
226	P	1.425	2	0.00715884
230	F	2.986	2	0.0170811
248	A	0.961	2	0.00715884
250	L	2.21	2
268	S	2.114	2	0.0369683
276	N	1.738	2	0.351111
279	I	1.04	2
280	A	1.576	2	0.000434804
289	H	1.026	2	0.00144557
3	M	0.349	1
7	H	0.392	1
8	F	0.414	1
9	R	0.406	1
10	V	0.401	1
11	A	0.401	1
12	L	0.391	1
13	I	0.358	1
14	P	0.441	1
15	F	0.386	1
16	F	0.386	1
17	A	0.388	1
18	A	0.385	1
19	F	0.386	1
20	C	0.483	1
22	P	0.392	1
23	V	0.361	1
24	F	0.386	1
27	P	0.421	1
28	E	0.384	1
29	T	0.394	1
30	L	0.472	1
31	V	0.389	1
32	K	0.39	1
33	V	0.385	1
36	A	0.361	1
37	E	0.384	1
38	D	0.362	1
41	G	0.373	1
42	A	0.385	1	0.000449425
43	R	0.492	1
44	V	0.389	1
45	G	0.373	1
46	Y	0.459	1
47	I	0.394	1
48	E	0.384	1
50	D	0.362	1
52	N	0.401	1
54	G	0.374	1
56	I	0.394	1
57	L	0.391	1
58	E	0.384	1
59	S	0.373	1
60	F	0.386	1
61	R	0.464	1
62	P	0.442	1
63	E	0.384	1
64	E	0.384	1
66	F	0.386	1
67	P	0.421	1
68	M	0.349	1
70	S	0.412	1
71	T	0.366	1
72	F	0.386	1
74	V	0.361	1
75	L	0.472	1
76	L	0.466	1
77	C	0.42	1
78	G	0.377	1
79	A	0.388	1
80	V	0.385	1
81	L	0.53	1
82	S	0.457	1
83	R	0.406	1
85	D	0.395	1
86	A	0.401	1
87	G	0.402	1
88	Q	0.45	1
89	E	0.384	1
90	Q	0.45	1
91	L	0.442	1
93	R	0.464	1
94	R	0.464	1
95	I	0.358	1
96	H	0.435	1
97	Y	0.405	1
98	S	0.402	1
99	Q	0.455	1
101	D	0.395	1
102	L	0.508	1
103	V	0.361	1
105	Y	0.459	1
106	S	0.447	1
107	P	0.421	1
108	V	0.401	1
109	T	0.39	1
110	E	0.384	1
111	K	0.389	1
112	H	0.392	1
113	L	0.391	1
114	T	0.394	1
116	G	0.416	1
117	M	0.349	1
119	V	0.385	1
120	R	0.403	1
121	E	0.384	1
122	L	0.53	1
123	C	0.483	1
124	S	0.373	1
125	A	0.361	1
126	A	0.401	1
128	T	0.407	1
129	M	0.349	1
131	D	0.362	1
132	N	0.401	1
133	T	0.366	1
134	A	0.378	1
135	A	0.401	1
136	N	0.401	1
137	L	0.53	1
138	L	0.391	1
139	L	0.472	1
140	T	0.39	1
141	T	0.394	1
142	I	0.394	1
143	G	0.402	1
144	G	0.402	1
146	K	0.389	1
147	E	0.384	1
148	L	0.466	1
149	T	0.407	1
150	A	0.361	1
151	F	0.386	1
152	L	0.508	1
154	N	0.401	1
155	M	0.349	1
156	G	0.402	1
159	V	0.385	1
160	T	0.381	1
161	R	0.464	1
162	L	0.391	1
166	E	0.384	1
167	P	0.425	1
168	E	0.384	1
169	L	0.472	1
170	N	0.366	1
171	E	0.384	1
172	A	0.401	1
174	P	0.421	1
176	D	0.395	1
177	E	0.384	1
178	R	0.406	1
180	T	0.407	1
181	T	0.394	1
183	P	0.392	1
185	A	0.385	1
186	M	0.349	1
188	T	0.391	1
189	T	0.393	1
190	L	0.508	1
191	R	0.464	1
192	K	0.39	1
193	L	0.466	1
194	L	0.53	1
195	T	0.366	1
197	E	0.384	1
198	L	0.466	1
199	L	0.391	1
200	T	0.366	1
201	L	0.466	1
202	A	0.361	1
203	S	0.457	1
204	R	0.456	1
205	Q	0.45	1
206	Q	0.45	1
207	L	0.53	1
208	I	0.358	1
209	D	0.395	1
210	W	0.454	1
211	M	0.349	1
212	E	0.384	1
213	A	0.388	1
214	D	0.362	1
216	V	0.361	1
217	A	0.385	1
219	P	0.421	1
220	L	0.391	1
222	R	0.464	1
225	L	0.391	1
227	A	0.361	1
228	G	0.416	1
229	W	0.454	1
231	I	0.358	1
232	A	0.361	1
233	D	0.362	1
234	K	0.39	1
235	S	0.402	1
236	G	0.402	1
241	R	0.407	1
242	G	0.402	1
243	S	0.402	1
245	G	0.373	1
246	I	0.394	1
247	I	0.358	1
251	G	0.402	1
252	P	0.421	1
254	D	0.362	1
255	G	0.373	1
256	K	0.389	1
257	P	0.442	1
258	S	0.456	1
259	R	0.406	1
260	I	0.394	1
261	V	0.385	1
262	V	0.361	1	0.000447427
263	I	0.394	1
264	Y	0.459	1
266	T	0.394	1
267	G	0.402	1
269	Q	0.455	1
270	A	0.385	1
271	T	0.366	1
272	M	0.349	1
273	D	0.362	1
274	E	0.384	1
277	R	0.403	1
278	Q	0.455	1
281	E	0.384	1
282	I	0.358	1
283	G	0.373	1
284	A	0.401	1
285	S	0.447	1
286	L	0.472	1
287	I	0.358	1
288	K	0.389	1
290	W	0.454	1
