# Supplementary material for: Network Models of TEM β-Lactamase Mutations Coevolving under Antibiotic Selection Show Modular Structure and Anticipate Evolutionary Trajectories
Source: PLoS Comput Biol. 2011 Sep 22;7(9):e1002184. doi: 10.1371/journal.pcbi.1002184 (PMC3178621; doi:10.1371/journal.pcbi.1002184)
Supplement: Table S4 — Cefotaxime gradient measurements. All mutants and controls tested experimentally for cefotaxime resistance are listed in column A. The concentration empirically found to produce adequate resolution (i.e. intermediate level of growth in the gradient) is listed in column B. Columns C through AF list measurements (in centimeters) of continuous growth at the optimized concentration. The limit of continuous growth at the optimized cefotaxime concentration is listed (in centimeters). The average of all the measurements for a given clone is shown in column AG, with the corresponding standard deviation, standard error and % standard error in columns AH, AJ, and AK respectively. The total number of measurements (n) for each clone is provided in column AI. (XLSX) [file pcbi.1002184.s007.xlsx]

## Sheet: Sheet1
SINGLES	optimal conc.	growth (cm)	growth (cm)	growth (cm)	growth (cm)	growth (cm)	growth (cm)	growth (cm)	growth (cm)	growth (cm)																						Average	Stdev	n	stand. error	standard error(%)	Normalized average
Q39R	0.04	2.6	1.8	2.05	1.9																											2.0875	0.35678	4	0.349644	16.7494	2.0875
L40W	0.04	2.4	2.3	2	1.6																											2.075	0.359398	4	0.35221	16.974	2.075
L51P	0.04	2.1	1.8	2.1	1.7																											1.925	0.206155	4	0.202032	10.4952	1.925
E104K	0.04	2.3	2	2.3																												2.2	0.173205	3	0.196	8.90909	2.2
R120S	0.04	2.35	1.4	2.2	1.8																											1.9375	0.426956	4	0.418417	21.5957	1.9375
H153R	0.04	2.9	1.95	2.05	2.15	1.8																										2.17	0.428077	5	0.375226	17.2915	2.17
R164H	0.04	2.3	4.8	3.7	2.8	2.3	3.3	3.05	5.45	4.7	3	3	3.3	4.1	3.1	2.8	3.2															3.43125	0.899977	16	0.440989	12.8521	3.43125
I173V	0.04	2.45	2.4	2.15	1.4																											2.1	0.484768	4	0.475073	22.6225	2.1
M182T	0.04	2.5	1.95	2																												2.15	0.304138	3	0.344165	16.0077	2.15
K215E	0.04	2.05	1.75																													1.9	0.212132	2	0.294	15.4737	1.9
A224V	0.04	2.15	1.7	1.9	1.7																											1.8625	0.2136	4	0.209328	11.2391	1.8625
G238S	0.12	7.4	4.45	6.25	5.2	6.1																										5.88	1.11837	5	0.980294	16.6717	9.61267
E240K	0.04	1.6	1	1.9	1.8																											1.575	0.403113	4	0.395051	25.0826	1.575
Q39R R164H	0.04	4.3	3.3	3.5	3.3	4.1																										3.7	0.469042	5	0.411133	11.1117	3.7
Q39R G238S	0.08	6.1	7.8	3.75	4.9																											5.6375	1.73175	4	1.69712	30.104	7.7565
Q39R E240K	0.04	1.85	2.6	2.55	2	1.8																										2.16	0.386329	5	0.338632	15.6774	2.16
L40W R164H	0.04	1.9	2.8	1.9	1.9																											2.125	0.45	4	0.441	20.7529	2.125
L51P E104K	0.04	1.8	1.9	1.58	1.33																											1.6525	0.253163	4	0.2481	15.0136	1.6525
L51P R164H	0.04	1.7	1.9	2	2																											1.9	0.141421	4	0.138593	7.29436	1.9
E104K H153R	0.04	3.05	2.45	2.7	2.7																											2.725	0.246644	4	0.241711	8.87014	2.725
E104K R164H	0.12	2.7	6.1	6	4.8	8.4	6.7	5.2	8.7	8.2	7	4.7	3.9	2.7	4.8	1.85	2	0.6	0.7	3.6	5.05											4.685	2.44239	20	1.07043	22.848	8.41767
E104K I173V	0.3	4	2.7																													3.35	0.919239	2	1.274	38.0299	10.8385
E104K M182T	0.04	4.4	4.15	2.1	2.4	2.33	1.45	2.9																								2.81857	1.08655	7	0.804924	28.5579	2.81857
E104K K215E	0.04	2.7	2.85	2	2																											2.3875	0.451617	4	0.442585	18.5376	2.3875
E104K A224V	0.04	1.8	2																													1.9	0.141421	2	0.196	10.3158	1.9
E104K G238S	2	3.3	2.3	3.5	3.15	4.1	3.05																									3.23333	0.589633	6	0.471804	14.5919	16.8266
R120S G238S	0.12	3.2	2.75	4.5																												3.48333	0.908754	3	1.02835	29.5221	7.216
H153R G238S	0.3	4.6	4.5	3.8	3.15																											4.0125	0.676233	4	0.662709	16.5161	11.501
R164H I173V	0.12	3.65	3.6	3.2	2.4																											3.2125	0.577891	4	0.566333	17.6291	6.94517
R164H A224V	0.04	2.9	3.4	4	4.3	4.1	4.7																									3.9	0.648074	6	0.518567	13.2966	3.9
R164H E240K	0.12	5.8	5.8	2.6	3.9	7.1	8	5.6	7.15																							5.74375	1.78154	8	1.23454	21.4937	9.47642
I173V E240K	0.08	1.6	1.4																													1.5	0.141421	2	0.196	13.0667	3.619
M182T G238S	0.3	8.4	8.4	9.1	9.5	7.5	9.2																									8.68333	0.730525	6	0.584542	6.73177	16.1719
K215E G238S	0.08	3.05	2.3	4.7	4.9	7.9	7.4	6.4	6	1.8	2.3	2.25	1.65																			4.22083	2.28338	12	1.29195	30.6088	6.33983
G238S E240K	0.3	4.8	7.6	3.1	2.8	4	5																									4.55	1.73407	6	1.38755	30.4955	12.0385
G238S T265M	0.3	4.4	4.8	2.7	2.25	3.7	2.6	1.7	3.8	2.5	5.1																					3.355	1.16582	10	0.722583	21.5375	10.8435
Q39R G238S E240K	0.3	2.3	1.9																													2.1	0.282843	2	0.392	18.6667	9.58855
Q39R R164H E240K	0.12	6.6	7	2.4	3.7	5.5	7																									5.36667	1.92111	6	1.53721	28.6436	9.09933
L40W E104K R164H	0.08	4.5	1.3	3.3	2.65																											2.9375	1.33378	4	1.3071	44.497	5.0565
L51I E104K G238S	0.04	2	1.9	2	1.6																											1.875	0.189297	4	0.185511	9.89392	1.875
L51P R164H I173V	0.04	2	1.75	1.65	1.75																											1.7875	0.149304	4	0.146318	8.18561	1.7875
L51I E104K M182T	0.04	4.55	3.8	1.48	1.43	2	2																									2.54333	1.30893	6	1.04736	41.1808	2.54333
E104K H153R I173V	0.04	2.1	2.65	3.2																												2.65	0.55	3	0.622384	23.4862	2.65
E104K H153R R164H	0.12	8.3	8.1	6.9																												7.76667	0.757188	3	0.856839	11.0323	11.4993
E104K H153R G238S	2	3.2	2.95	4.35	3.6	6.2																										4.06	1.30834	5	1.14681	28.2465	17.6533
E104K R164H A224V	0.12	3.5	2.7	5.9	8	7.8																										5.58	2.42425	5	2.12495	38.0816	9.31267
E104K R164H I173V	0.3	8.85	9.15	9.2	8.8																											9	0.204124	4	0.200042	2.22269	16.4885
E104K R164H M182T	0.6	6.45	7.3	5.2	7.1	7.9	7.7																									6.94167	0.992178	6	0.793908	11.4368	16.8631
E104K G238S T265M	0.6	9.4	9.55	9.5																												9.48333	0.0763763	3	0.0864279	0.911366	19.4048
E104K K215E G238S	0.3	3.5	3.1	3.7	4.8																											3.775	0.727438	4	0.71289	18.8845	11.2635
R120S H153R G238S	0.3	7.7	7.6	5.3																												6.86667	1.35769	3	1.53638	22.3744	14.3552
R120S G238S E240K	0.6	2.9	3.1																													3	0.141421	2	0.196	6.53333	12.9215
H153R M182T G238S	0.6	8.4	7.7	6.7	7.8	8.9	8.65																									8.025	0.801093	6	0.641008	7.98764	17.9465
H153R R164H G238S	0.12	3.4	1.8	1.6																												2.26667	0.986577	3	1.11642	49.2537	5.99933
I173V R164H E240K	0.6	7.7	6.75	8.45	8.7	5.7	4.5	8.5	9.35	8.35																						7.55556	1.59304	9	1.04079	13.7751	17.477
WT	0.04	1.9	2.35	1.8	1.2	1.2	2.4	2.3	2.8	2	2.3	1.8	2.1	1.45	2.1	2.1	1.45	2.2	1.8	1.9	1.8	1.9	0.04	1.85	0.04	1.8	0.04	1.3	0.04	1.8	0.04	1.59333	0.789733	30	0.282602	17.7365	1.59333
Δ	0.04	1.4	2.25	1.75	2.1	2.05	2.9	1.95	1.9	1.1	1.5	1.25	1.1	1.55	1.8	1.75																1.75667	0.475795	15	0.240786	13.707	1.75667
E104K R164S G267R	0.3	7.8	8.7	8.6	9.4	7.8	9.4	6.7	5.9	4.05	5	7.2																				7.32273	1.76485	11	1.04296	14.2427	14.8113
	0.6	2.8	3.2	2.5	4.35	1.8	2.45	1.6	2.65	2.55																						2.65556	0.799392	9	0.52227	19.6671	12.577
																																				18.7324
