# Supplementary material for: Network Models of TEM β-Lactamase Mutations Coevolving under Antibiotic Selection Show Modular Structure and Anticipate Evolutionary Trajectories
Source: PLoS Comput Biol. 2011 Sep 22;7(9):e1002184. doi: 10.1371/journal.pcbi.1002184 (PMC3178621; doi:10.1371/journal.pcbi.1002184)
Supplement: Table S8 — Calculation of conversion factor used to extrapolate growth to the gradient concentration used for wild-type. A conversion factor was used to compare results from gradients containing different drug concentrations. To that end, we measured the growth distance for a number individual reference clones at two contiguous concentrations and averaged the difference. This average difference was used to extrapolate measurements to the concentration used to run the wild-type and clones with low levels of resistance (0.04 ug/ml). The number of clones tested for each conversion step (n) is listed in column 2, the difference between contiguous concentrations in column 3, and the aggregate average difference (conversion factor), in column 4. (XLSX) [file pcbi.1002184.s011.xlsx]

## Sheet: Sheet1
Concentration	n	Difference	Conversion factor
0.04 to 0.08	8	2.12	2.119
0.04 to 0.12	11	1.61	3.73267
0.04 to 0.3	7	3.76	7.48855
0.04 to 0.6	10	2.43	9.92145
0.04 to 2	4	3.67	13.5933
0.04 to 4	1	0.6	14.1933
