# Supplementary material for: Network Models of TEM β-Lactamase Mutations Coevolving under Antibiotic Selection Show Modular Structure and Anticipate Evolutionary Trajectories
Source: PLoS Comput Biol. 2011 Sep 22;7(9):e1002184. doi: 10.1371/journal.pcbi.1002184 (PMC3178621; doi:10.1371/journal.pcbi.1002184)
Supplement: Table S9 — Calculation of average effect of mutations at individual positions tested in a variety of sequence contexts. 14 out of 16 positions identified in high betweenness centrality trajectories were tested experimentally in a variety of sequence contexts. For each position, the most frequent mutation found in our database was used (see Table 6). The position being tested (M1) is listed in column 1, and its count in our database in column 2. Additional mutations (M2) are listed in column 3. The growth, in centimeters (extrapolated to a cefotaxime gradient of 0.04 ug/ml, see ) is listed in columns 3 (M1), 6 (M2) and 8 (M1+M2). The difference between M1+M2 and M2 measurements, representing the effect of M1 on resistance, is listed in column 11. We conservatively estimated the combined standard error to be the sum of the standard errors (p<0.05) of M2 and M1+M2 (column 10). The effect of M1 was considered to be significant (p<0.05) when the value for the combined margin of error was smaller than the p-value of the effect (column 12). Columns 13-15 list the average for each M1 position, the maximal positive effect, and the maximal negative effect, respectively. These values are listed also in Table 6 of the main text, columns 5 and 6. (XLSX) [file pcbi.1002184.s012.xlsx]

## Sheet: Sheet1
M1	Count	M1 growth	M1 std error	M2	M2 growth	M2 std error	M1+M2 growth	M1+M2 std error	Combined std error	Δ (Doublet-M2)	Effect p<0.05	Average effect	Max +	Max -	Sign epistasis	n
164	48	3.43	0.44	wt	1.59	0.28	3.43	0.44	0.72	1.84	pos	4.18308	14.04	-5.5	yes	13
164	48	3.43	0.44	39	2.09	0.35	3.7	0.41	0.76	1.61	pos
164	48	3.43	0.44	40	2.08	0.35	2.13	0.44	0.79	0.05
164	48	3.43	0.44	51	1.93	0.2	1.9	0.14	0.34	-0.03
164	48	3.43	0.44	104	2.2	0.2	8.42	1.07	1.27	6.22	pos
164	48	3.43	0.44	173	2.1	0.48	6.95	0.57	1.05	4.85	pos
164	48	3.43	0.44	224	1.86	0.21	3.9	0.52	0.73	2.04	pos
164	48	3.43	0.44	240	1.58	0.4	9.48	1.23	1.63	7.9	pos
164	48	3.43	0.44	39 240	2.16	0.34	9.1	1.54	1.88	6.94	pos
164	48	3.43	0.44	104 153	2.73	0.24	11.5	0.86	1.1	8.77	pos
164	48	3.43	0.44	104 173	10.84	1.27	16.49	0.2	1.47	5.65	pos
164	48	3.43	0.44	153 238	11.5	0.66	6	1.12	1.78	-5.5	neg
164	48	3.43	0.44	182 104	2.82	0.8	16.86	0.79	1.59	14.04	pos
104	48	2.2	0.2	wt	1.59	0.28	2.2	0.2	0.48	0.61	pos	4.03667	9.54	-0.28	yes	15
104	48	2.2	0.2	51	1.93	0.2	1.65	0.25	0.45	-0.28
104	48	2.2	0.2	153	2.17	0.38	2.73	0.24	0.62	0.56
104	48	2.2	0.2	164	3.43	0.44	8.42	1.07	1.51	4.99	pos
104	48	2.2	0.2	173	2.1	0.48	10.84	1.27	1.75	8.74	pos
104	48	2.2	0.2	182	2.15	0.34	2.82	0.8	1.14	0.67
104	48	2.2	0.2	215	1.9	0.29	2.39	0.44	0.73	0.49
104	48	2.2	0.2	224	1.86	0.21	1.9	0.2	0.41	0.04
104	48	2.2	0.2	238	9.61	0.98	16.83	0.47	1.45	7.22	pos
104	48	2.2	0.2	164 40	2.13	0.44	5.06	1.31	1.75	2.93	pos
104	48	2.2	0.2	164 224	3.9	0.52	9.31	2.12	2.64	5.41	pos
104	48	2.2	0.2	173 164	6.95	0.57	16.49	0.2	0.77	9.54	pos
104	48	2.2	0.2	215 238	6.34	1.29	11.26	0.71	2	4.92	pos
104	48	2.2	0.2	238 153	11.5	0.66	17.65	1.15	1.81	6.15	pos
104	48	2.2	0.2	238 265	10.84	0.72	19.4	0.09	0.81	8.56	pos
238	38	9.61	0.98	wt	1.59	0.28	9.61	0.98	1.26	8.02	pos
238	38	9.61	0.98	39	2.09	0.35	7.76	1.7	2.05	5.67	pos	8.03455	14.63	0.23	no	11
238	38	9.61	0.98	104	2.2	0.2	16.83	0.47	0.67	14.63	pos
238	38	9.61	0.98	120	1.94	0.42	7.22	1.03	1.45	5.28	pos
238	38	9.61	0.98	153	2.17	0.38	11.5	0.66	1.04	9.33	pos
238	38	9.61	0.98	182	2.15	0.34	16.17	0.58	0.92	14.02	pos
238	38	9.61	0.98	215	1.9	0.29	6.34	1.29	1.58	4.44	pos
238	38	9.61	0.98	240	1.58	0.4	12.04	1.39	1.79	10.46	pos
238	38	9.61	0.98	39 240	2.16	0.34	9.59	0.39	0.73	7.43	pos
238	38	9.61	0.98	104 51	1.65	0.25	1.88	0.19	0.44	0.23
238	38	9.61	0.98	215 104	2.39	0.44	11.26	0.71	1.15	8.87	pos
240	31	1.58	0.4	wt	1.59	0.28	1.58	0.4	0.68	-0.01
240	31	1.58	0.4	39	2.09	0.35	2.16	0.34	0.69	0.07		3.96125	10.53	0.07	no	8
240	31	1.58	0.4	164	3.43	0.44	9.48	1.23	1.67	6.05	pos
240	31	1.58	0.4	173	2.1	0.48	3.62	0.2	0.68	1.52	pos
240	31	1.58	0.4	238	9.61	0.98	12.04	1.39	2.37	2.43	pos
240	31	1.58	0.4	39 164	3.7	0.41	9.1	1.54	1.95	5.4	pos
240	31	1.58	0.4	120 238	7.22	1.03	12.92	0.2	1.23	5.7	pos
240	31	1.58	0.4	164 173	6.95	0.57	17.48	1.04	1.61	10.53	pos
182	27	2.15	0.34	wt	1.59	0.28	2.15	0.34	0.62	0.56
182	27	2.15	0.34	104	2.2	0.2	2.82	0.8	1	0.62		3.92	8.44	0.62	no	6
182	27	2.15	0.34	238	9.61	0.98	16.17	0.58	1.56	6.56	pos
182	27	2.15	0.34	104 164	8.42	1.07	16.86	0.79	1.86	8.44	pos
182	27	2.15	0.34	104 51	1.65	0.25	2.54	1.05	1.3	0.89
182	27	2.15	0.34	238 153	11.5	0.66	17.95	0.64	1.3	6.45	pos
265	20	NA		wt	1.59	0.28	NA	NA				1.9	2.57	1.23	no	2
265	20	NA		238	9.61	0.98	10.84	0.72	1.7	1.23
265	20	NA		104 238	16.83	0.47	19.4	0.09	0.56	2.57	pos
153	9	2.17	0.38	wt	1.59	0.28	2.17	0.38	0.66	0.58		0.95375	7.14	-8.19	yes	4
153	9	2.17	0.38	104	2.2	0.2	2.73	0.24	0.44	0.53
153	9	2.17	0.38	238	9.61	0.98	11.5	0.66	1.64	1.89	pos
153	9	2.17	0.38	104 164	8.42	1.07	11.5	0.86	1.93	3.08	pos
153	9	2.17	0.38	104 173	10.84	1.27	2.65	0.62	1.89	-8.19	neg
153	9	2.17	0.38	104 238	16.83	0.47	17.65	1.15	1.62	0.82
153	9	2.17	0.38	120 238	7.22	1.03	14.36	1.54	2.57	7.14	pos
153	9	2.17	0.38	182 238	16.17	0.58	17.95	0.64	1.22	1.78	pos
173	5	2.1	0.48	wt	1.59	0.28	2.1	0.48	0.76	0.51		3.82375	8.64	-0.11	no	8
173	5	2.1	0.48	104	2.2	0.2	10.84	1.27	1.47	8.64	pos
173	5	2.1	0.48	164	3.43	0.44	6.95	0.57	1.01	3.52	pos
173	5	2.1	0.48	240	1.58	0.4	3.62	0.2	0.6	2.04	pos
173	5	2.1	0.48	104 153	2.73	0.24	2.65	0.62	0.86	-0.08
173	5	2.1	0.48	104 164	8.42	1.07	16.49	0.2	1.27	8.07	pos
173	5	2.1	0.48	164 51	1.9	0.14	1.79	0.15	0.29	-0.11
173	5	2.1	0.48	240 164	9.48	1.43	17.48	1.04	2.47	8	pos
120	3	1.94	0.42	wt	1.59	0.28	1.94	0.42	0.7	0.35		0.425	2.86	-2.39	yes	4
120	3	1.94	0.42	238	9.61	0.98	7.22	1.03	2.01	-2.39	neg
120	3	1.94	0.42	238 153	11.5	0.66	14.36	1.54	2.2	2.86	pos
120	3	1.94	0.42	240 238	12.04	1.39	12.92	0.2	1.59	0.88
224	3	1.86	0.21	wt	1.59	0.28	1.86	0.21	0.49	0.27		0.3325	0.89	-0.3	yes	4
224	3	1.86	0.21	104	2.2	0.2	1.9	0.2	0.4	-0.3
224	3	1.86	0.21	164	3.43	0.44	3.9	0.52	0.96	0.47
224	3	1.86	0.21	104 164	8.42	1.07	9.31	2.12	3.19	0.89
215	2	1.9	0.29	wt	1.59	0.28	1.9	0.29	0.57	0.31		-2.085	0.19	-5.57	no	4
215	2	1.9	0.29	104	2.2	0.2	2.39	0.44	0.64	0.19
215	2	1.9	0.29	238	9.61	0.98	6.34	1.29	2.27	-3.27	neg
215	2	1.9	0.29	104 238	16.83	0.47	11.26	0.71	1.18	-5.57	neg
51	2	1.93	0.2	wt	1.59	0.28	1.93	0.2	0.48	0.34		-3.68833	-0.28	-14.95	no	6
51	2	1.93	0.2	104	2.2	0.2	1.65	0.25	0.45	-0.55	neg
51	2	1.93	0.2	164	3.43	0.44	1.9	0.14	0.58	-1.53	neg
51	2	1.93	0.2	182 104	2.82	0.08	2.54	1.05	1.13	-0.28
51	2	1.93	0.2	173 164	6.95	0.57	1.79	0.15	0.72	-5.16	neg
51	2	1.93	0.2	238 104	16.83	0.47	1.88	0.19	0.66	-14.95	neg
268	2								0	0
40	1	2.08	0.35	wt	1.59	0.28	2.08	0.35	0.63	0.49		-1.39	-1.3	-3.36	no	3
40	1	2.08	0.35	164	3.43	0.44	2.13	0.44	0.88	-1.3	neg
40	1	2.08	0.35	104 164	8.42	1.07	5.06	1.31	2.38	-3.36	neg
39	1	2.09	0.35	wt	1.59	0.28	2.09	0.35	0.63	0.5		-0.555	0.27	-2.45	yes	6
39	1	2.09	0.35	164	3.43	0.44	3.7	0.41	0.85	0.27
39	1	2.09	0.35	238	9.61	0.98	7.76	1.7	2.68	-1.85
39	1	2.09	0.35	240	1.58	0.4	2.16	0.34	0.74	0.58
39	1	2.09	0.35	240 164	9.48	1.43	9.1	1.54	2.97	-0.38
39	1	2.09	0.35	240 238	12.04	1.39	9.59	0.39	1.78	-2.45	neg
